# Supplementary material for: Dissecting regulatory pathways for transcription recovery following DNA damage reveals a non-canonical function of the histone chaperone HIRA
Source: PubMed Central journal article supplement (PMC8219801; doi:10.1038/s41467-021-24153-1), 2021-06-22
Supplement: 41467_2021_24153_MOESM3_ESM.pdf [file 41467_2021_24153_MOESM3_ESM.pdf]

## Description of Additional Supplementary Files

File Name: Supplementary Data 1

Description: **Bru-seq in UV-irradiated HeLa cells upon HIRA knockdown (siHIRA#1).**

RPKM values before and after biological scaling normalization for all genes with RPKM>0 at the indicated time points after UVC irradiation in HeLa cells treated with the indicated siRNAs (siLUC, control).

File Name: Supplementary Data 2

Description: **Bru-seq in UV-irradiated HeLa cells upon HIRA knockdown (siHIRA#2).**

RPKM values before and after biological scaling normalization for all genes with RPKM>0 at the indicated time points after UVC irradiation in HeLa cells treated with the indicated siRNAs (siLUC, control).

File Name: Supplementary Data 3

Description: **Bru-seq in UV-irradiated HeLa cells upon ERCC6 knockdown.**

RPKM values before and after biological scaling normalization for all genes with RPKM>0 at the indicated time points after UVC irradiation in HeLa cells treated with the indicated siRNAs (siLUC, control).
